# Supplementary material
Source: PubMed Central journal article supplement (PMC5412087)
Supplement: kfw261_Supp.pdf [file kfw261_Supp.pdf]

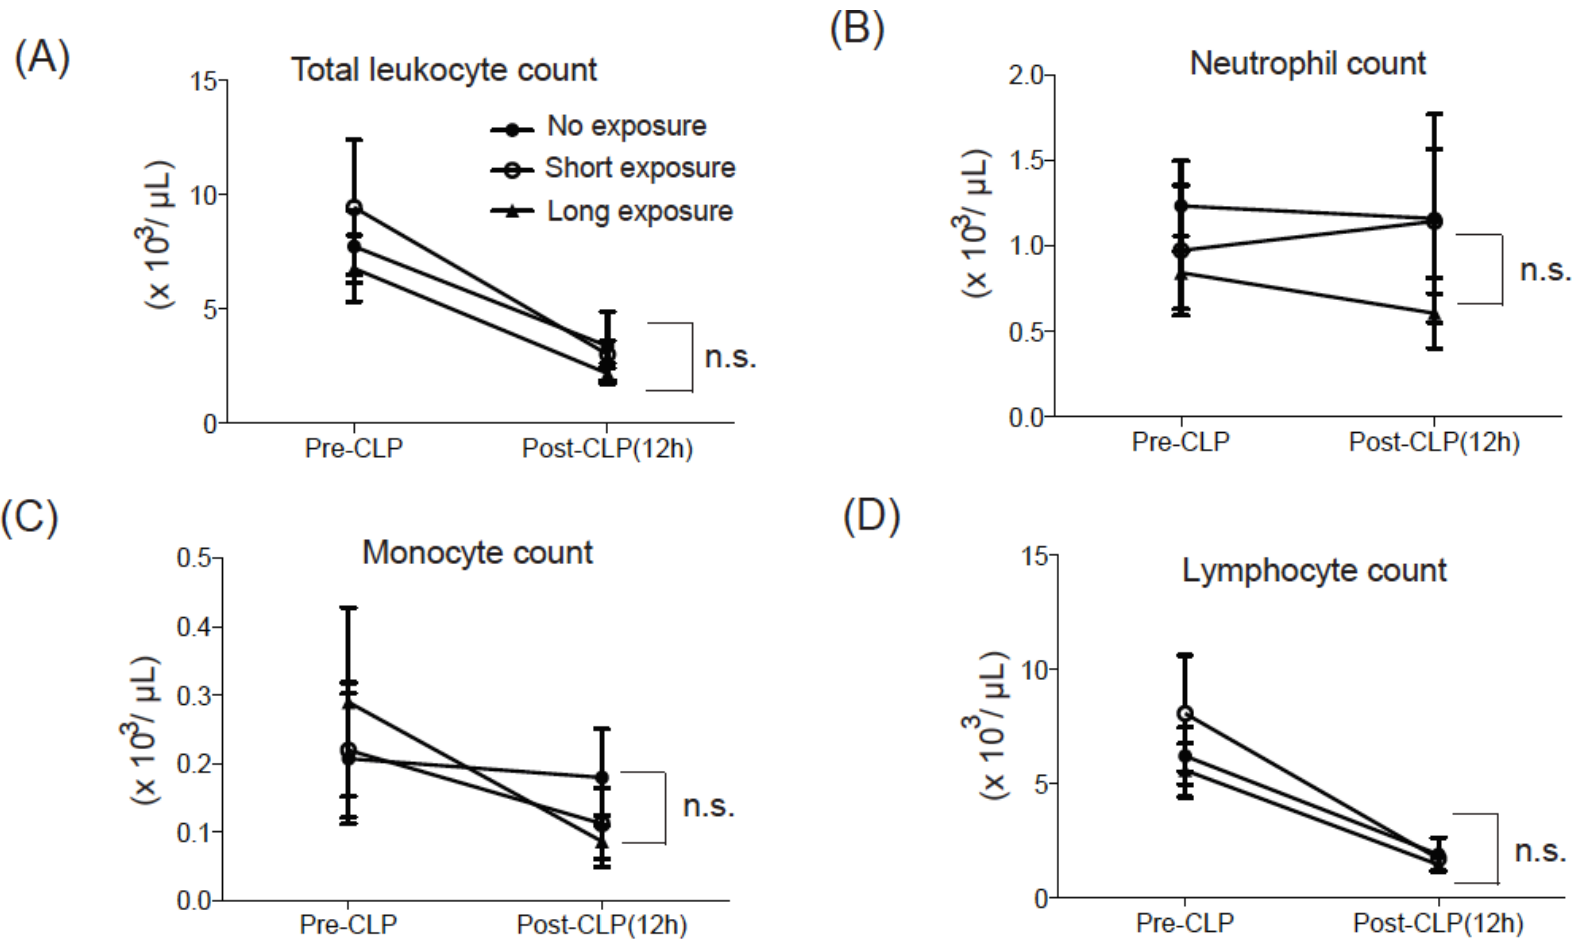

**Supplemental Figure 1. The changes in peripheral leukocyte counts after CLP and isoflurane exposure**

The number of leukocytes was counted as described in the Methods. The data represent mean  $\pm$  S.D. of 4 mice. Statistical analysis was performed using two-way analysis of variance with Bonferroni *post hoc* analysis. No statistical significance was observed post-CLP (n.s.= not significant).

(A)

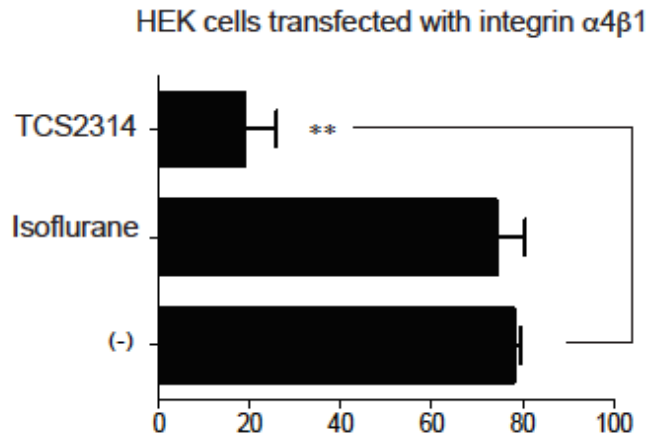

(B)

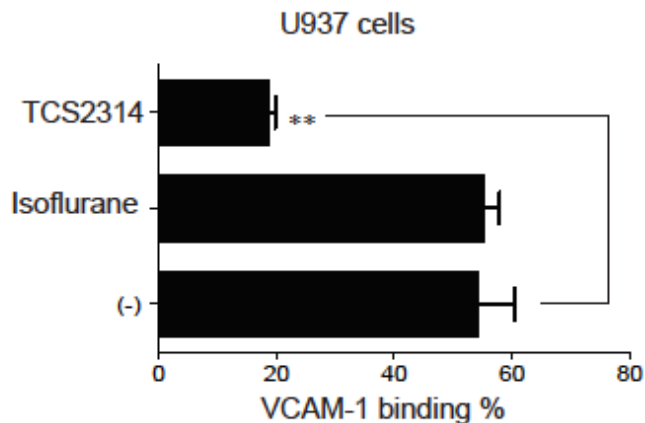

### Supplemental Figure 2. The effect of isoflurane on integrin $\alpha_4\beta_1$

The binding of  $\alpha_4\beta_1$  to its ligand VCAM-1 with or without isoflurane was tested in HEK cells with transient expression of  $\alpha_4\beta_1$  (A) and U937 cells (B). In U937 cells, the endogenous expression of  $\alpha_4\beta_1$  was confirmed with flow cytometry (data not shown). As a positive control, 10  $\mu$ M of  $\alpha_4\beta_1$  inhibitor TCS2314 was used. VCAM1 binding % was shown as mean  $\pm$  S.D. of quadruplicates. Statistical analysis was performed using one-way analysis of variance with Bonferonni *post hoc* analysis. \* and \*\* denote  $p < 0.05$  and  $p < 0.01$ , respectively.

**Supplemental Table 1. Total leukocyte and neutrophil counts in peripheral blood**

|                  | Total leukocytes (x 10 <sup>3</sup> /μL) | Neutrophils (x 10 <sup>3</sup> /μL) |
|------------------|------------------------------------------|-------------------------------------|
| WT (n= 13)       | 8.03 +/- 3.31                            | 1.12 +/- 0.46                       |
| LFA-1 KO (n=9)   | 15.48 +/- 4.02**                         | 4.67 +/- 1.66**                     |
| Mac-1 KO (n=8)   | 8.27 +/- 5.41                            | 1.46 +/- 0.92                       |
| ICAM-1 KO (n=4)  | 9.72 +/- 1.29                            | 1.55 +/- 0.36                       |
| BLT1 KO (n= 12)  | 13.41 +/- 3.57*                          | 4.47 +/- 2.74**                     |
| CXCR2 KO (n= 10) | 11.61 +/- 5.29                           | 2.98 +/- 1.67                       |

Statistical analysis was performed using one-way analysis of variance with Bonferroni *post hoc* analysis. \* denotes P < 0.05 versus WT.
